# Supplementary material for: Multilayered PVDF-HFP Porous Separator via Phase Separation and Selective Solvent Etching for High Voltage Lithium-Ion Batteries
Source: MDPI journal article supplement (doi:10.3390/membranes11010041), 2021-01-07
Supplement: s1 [file s1]

## Supporting Information

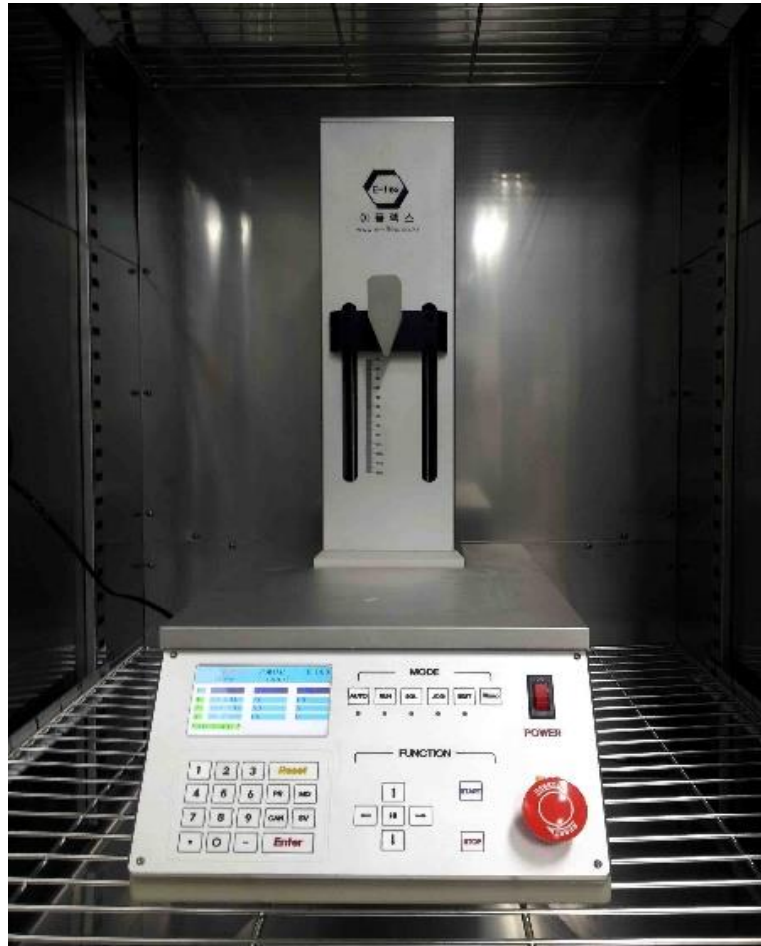

**Figure S1.** Photograph of the E-flex dip coater used in this study

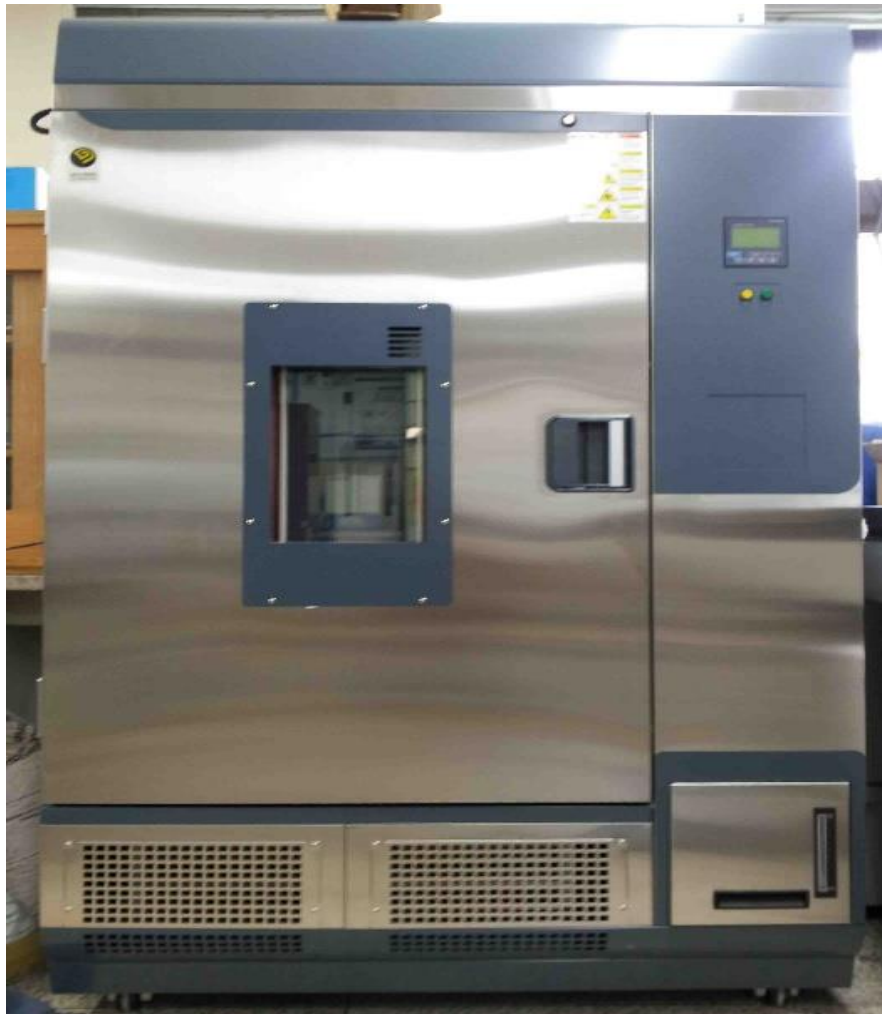

**Figure S2.** Photograph of the temperature and humidity controller.

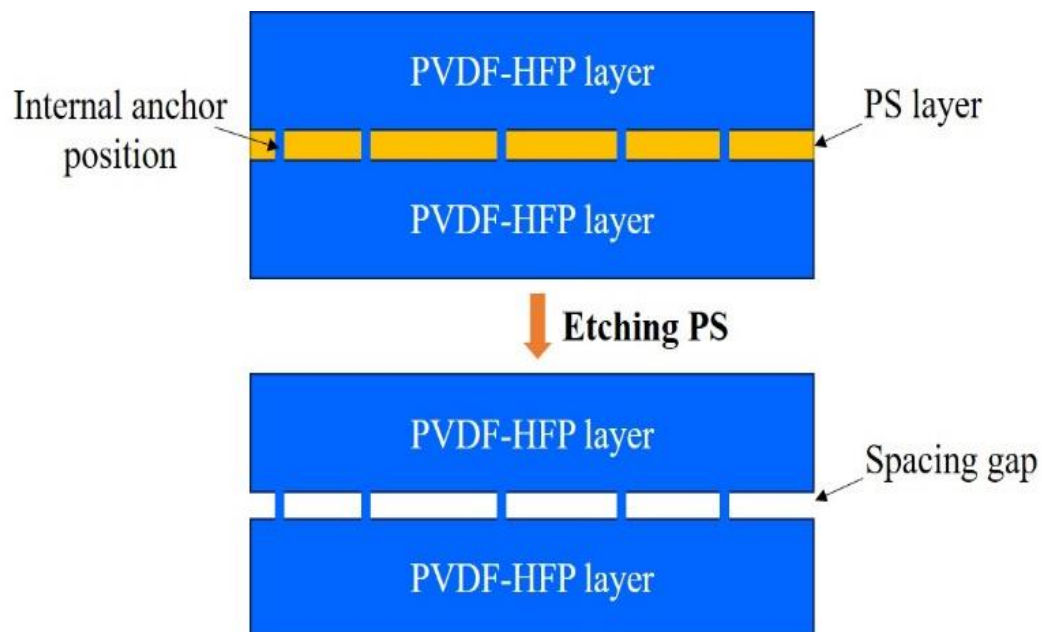

**Scheme S1.** Effect of the PS layer thickness on the adhesion between PVDF-HFP layers.

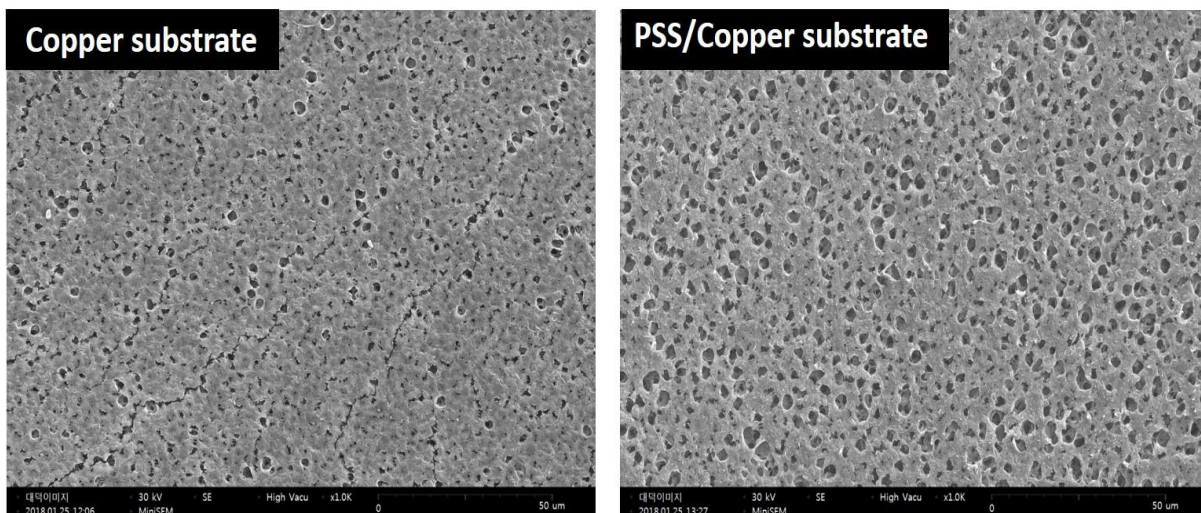

**Figure S3.** Surface morphology of the backside of the film (facing the substrate) using bare copper and PSS-coated copper substrates.

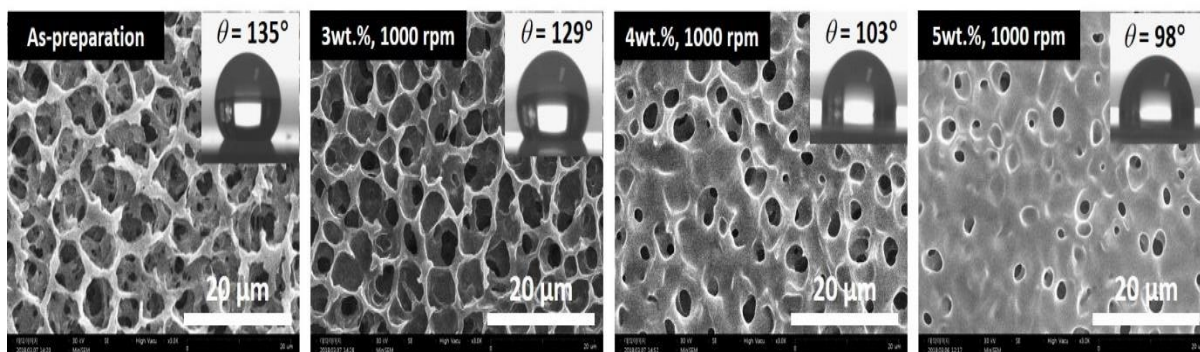

**Figure S4.** Surface morphology of the porous PVDF-HFP film after coating with a PS solution with different concentrations. The spin-coating was done at a rotational speed of 1000 rpm for 40 s.

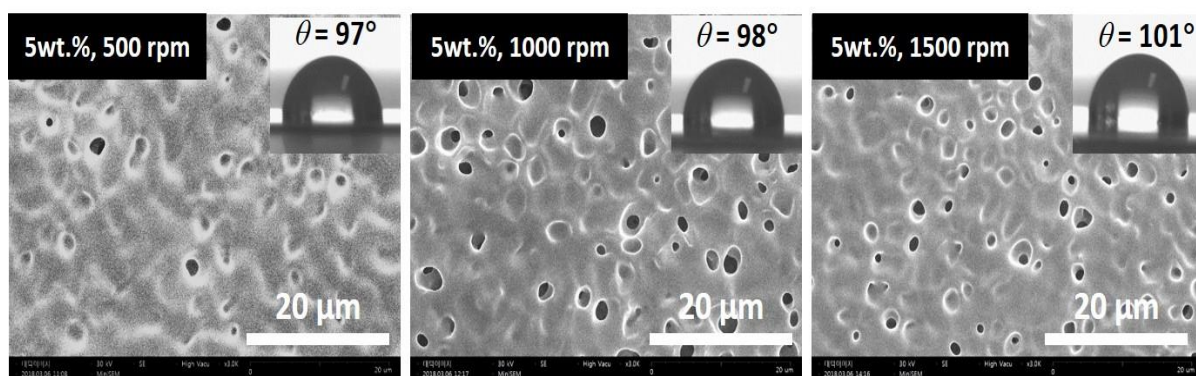

**Figure S5.** Surface morphology of the porous PVDF-HFP film after coating with a 5 wt.% PS solution at different rotational speeds.

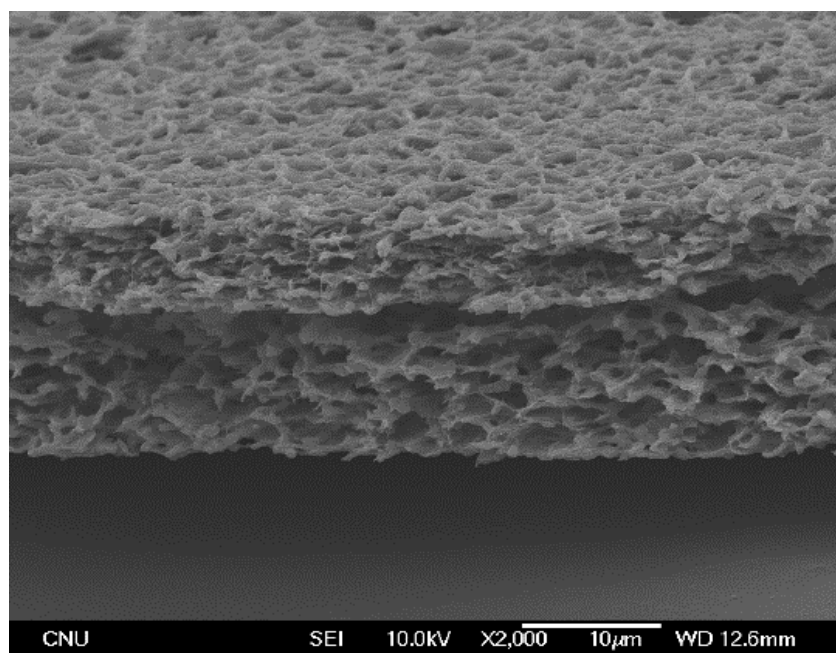

**Figure S6.** Cross-sectional morphology of the two-layer structured porous PVDF-HFP membrane prepared with a thicker PS coating layer.
